# Supplementary material
Source: PubMed Central journal article supplement (PMC4033716)

# Signage Used in HealthWorks Worksite Stair Use Promotion Campaign

Pages 3 – 8: Full-page signs hung in  
worksites

Pages 9 – 14: Table Tents placed in  
worksites

Pages 15 – 19: Posters hung in worksite  
stairwells

Pages 20 – 21: Posters from the DO Groove  
campaign Blue Cross Blue Shield of  
Minnesota

Pages 22 – 44: Riddles in and around  
stairwells.

Pages 45 – 60: CDC Posters

## **Overview of the Stairwell Intervention Basic Stair Intervention**

Assessment of the stairs was made at baseline to determine what environmental interventions could be done to improve the aesthetics of the stairs to make it more likely that employees would use the stairs.

### **Artwork in the Stairs**

Posters were chosen from the website allposters.com by the HealthWorks staff and approved at each site by the advisory committee.

Posters were placed in the stairwells using two mounting techniques. The first technique used was less permanent and many posters were promptly taken. The second mounting technique was a frame permanently mounted to the wall in which posters could be interchanged from the front without removing the frame from the wall. This technique was more expensive but the pictures were not stolen as frequently. The artwork was changed 3-8 times.

### **Music in the Stairs at each Worksite**

Music was chosen from iTunes by the HealthWorks staff and approved at each site by the advisory committee and facilities management installed the stereos.

### **Promotion**

Posters were placed throughout the building at all sites to promote stair use. These were changed several times throughout the two-year period for variety. Table tents were also used to promote stair use. They were also changed for variety. All sites promoted using the stairs in newsletters.

Riddle of the day was a two-week challenge.

Week 1: Five riddle questions are placed in the stairwells the first week. The answers are placed one level up or one level down.

The riddle of the day is emailed to participants each day. They use the stairwells to find the answer. Participants email the answer to the question to us and are then entered into the prize drawing.

Week 2: Remove the old riddles. Place a new set of 5 riddles.

# The Cheapest Gym Anywhere...

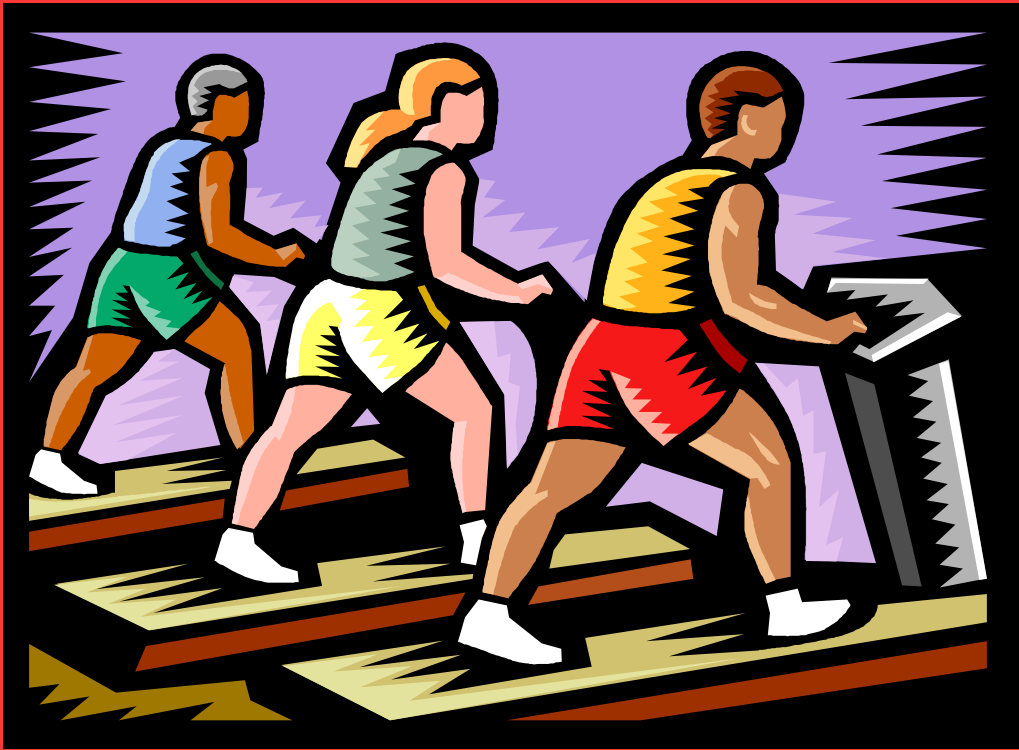

# The Stairs!

Feeling Stressed  
Burn Some Steam

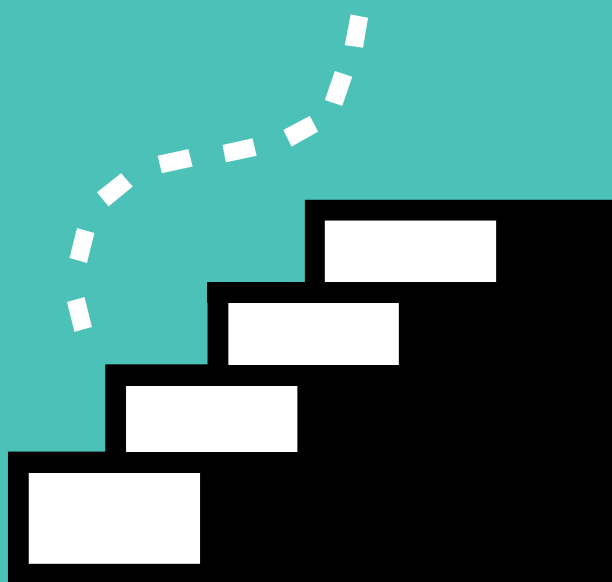

Take the STAIRS

*Raise Your  
Fitness Level,*

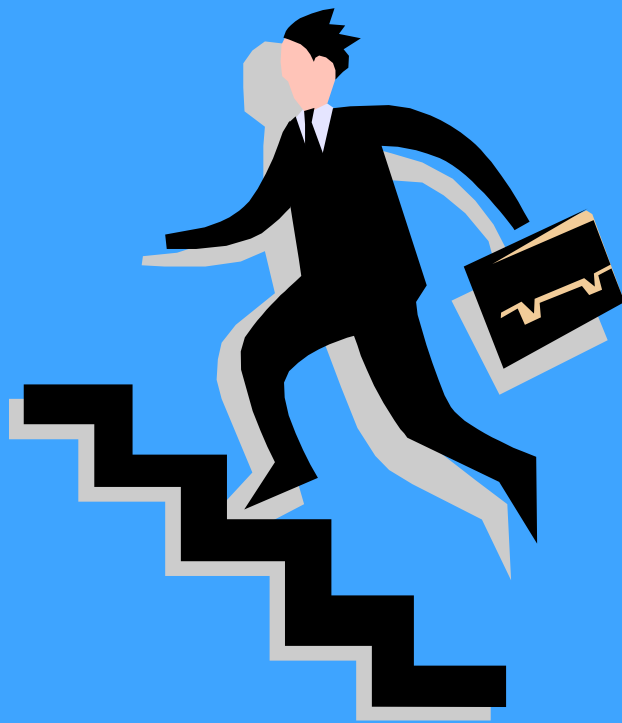

*One Step at a  
Time*

*Physical activity will  
add  
Years to your life,*

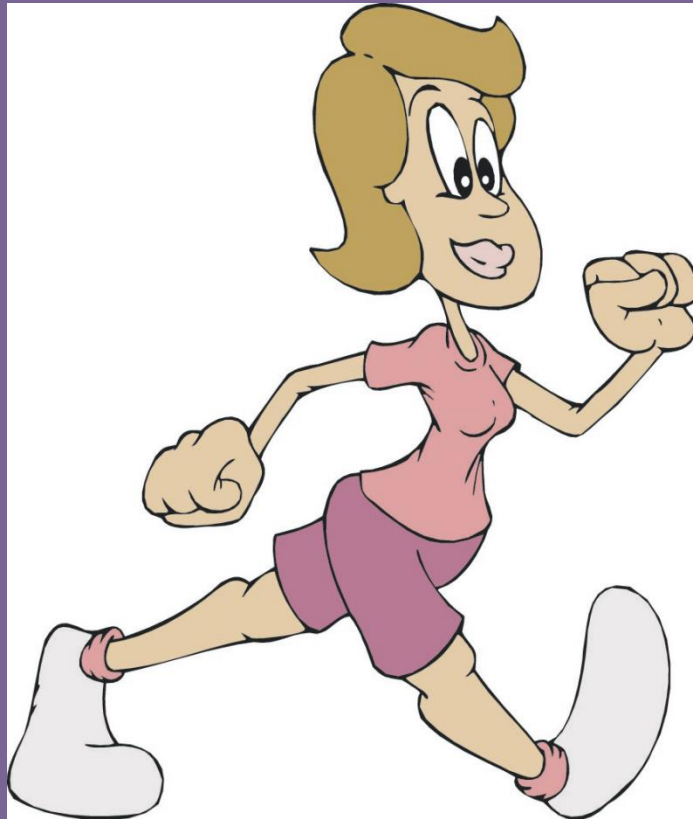

*And life to your years.*

**Do Some  
Reps...**

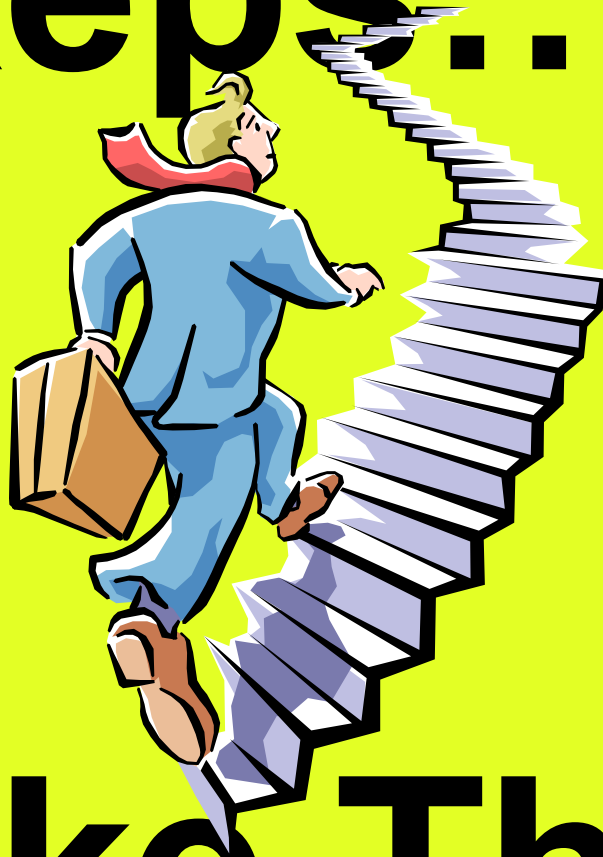

**Take The  
Steps**

**Walk Stairs...**

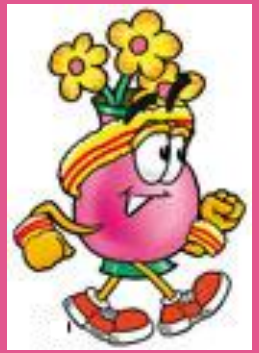

**Burn Calories...**

**Feel Better...**

**Weigh Less...**

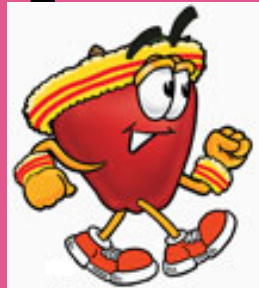

**Simple, Isn't it?**



AND LIFE TO YOUR YEARS.

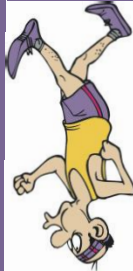

YEARS TO YOUR LIFE,

PHYSICAL ACTIVITY WILL ADD

*Walk Stairs...*

*Burn Calories...*

*Feel Better...*

*Weigh Less...*

*Simple, Isn't it?*

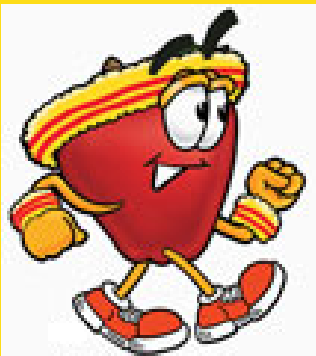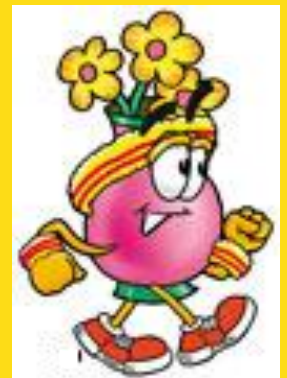

*We Repeatedly Do*

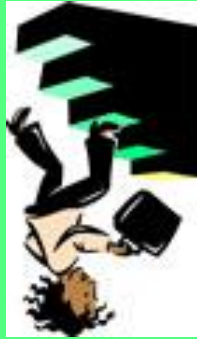

*We are What*

Feeling Stressed  
Burn Some Steam

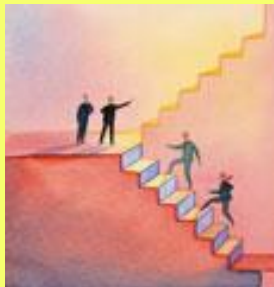

Take the STAIRS

New Fitness Level!

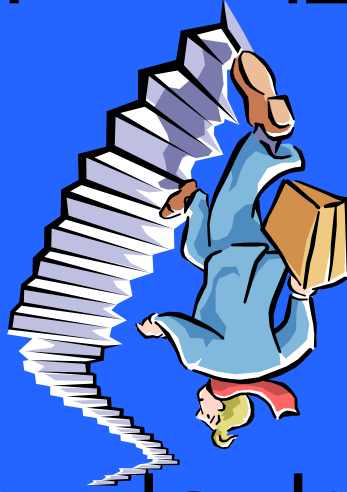

Step Up To A

*The Cheapest Gym Anywhere...*

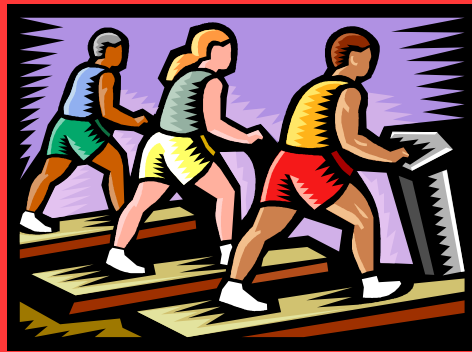

*The Stairs!*

Your Daily Routine

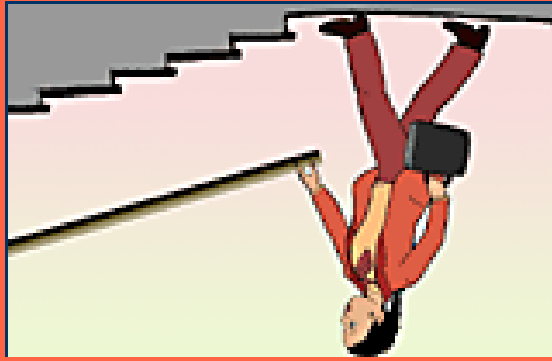

Sneak Activity into

*Raise Your  
Fitness Level,*

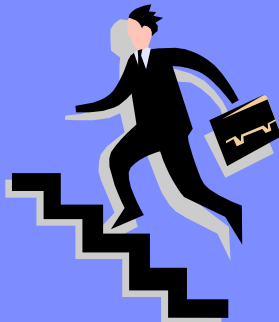

*One Step at a Time*

Take The Steps

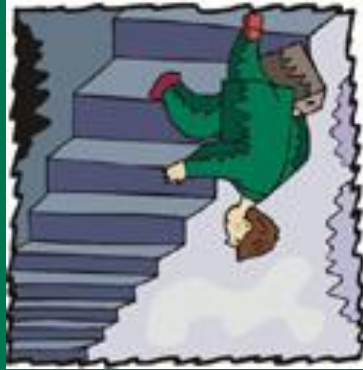

Do Some Reps...

Fight Fat....

Feel Fit....

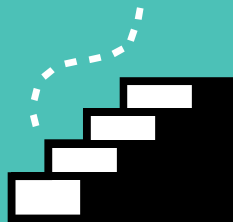

Frequent These Flights

For A Healthier You!

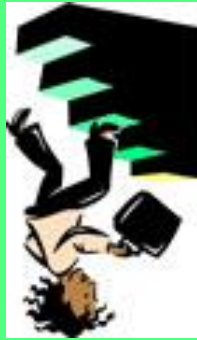

HealthWorks

Feeling Stressed  
Burn Some Steam



Take the STAIRS

# Humorous Posters

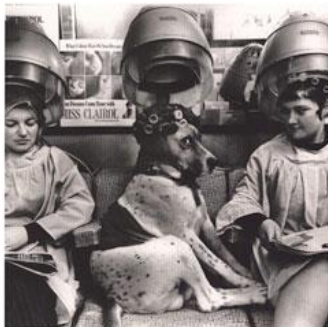

\$14.99, 20x16, #315872

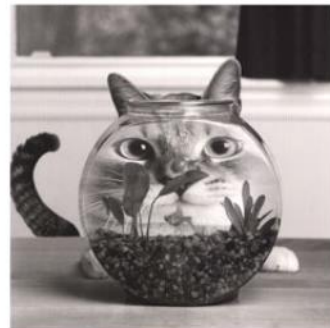

\$14.99, 16x16, #315868

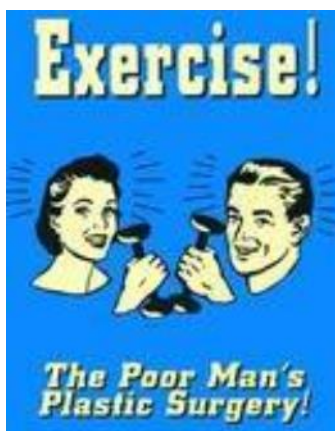

\$6.99, 11x14, #1248675

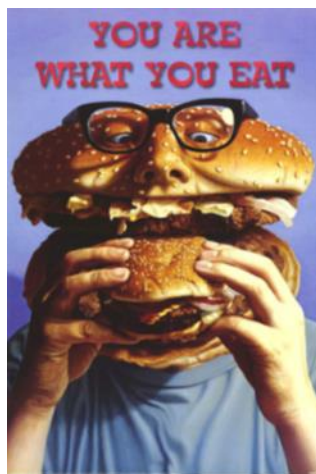

\$9.99, 24x36, #406836

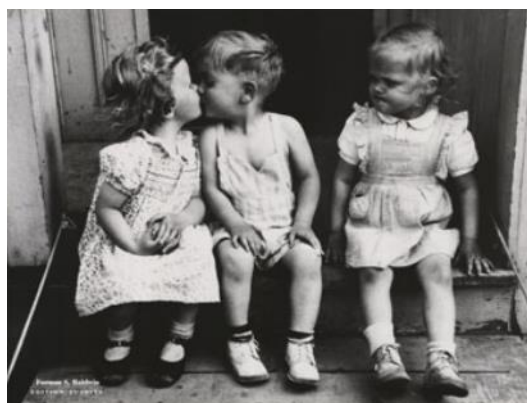

\$11.99, 24x18, #325745



# Fine Art Posters

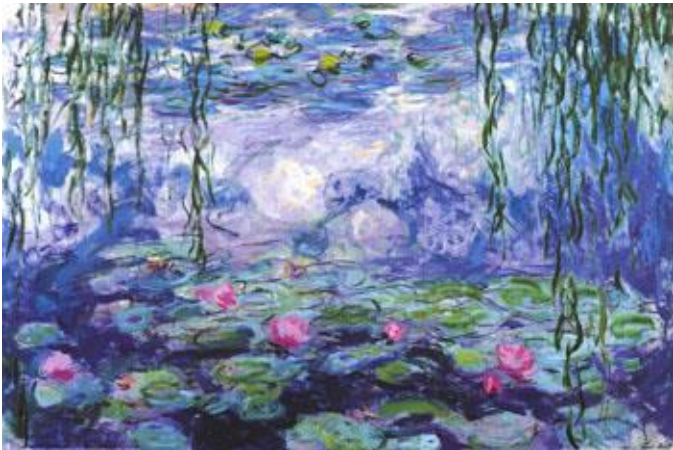

\$13.99, 36x24, #314230, Monet

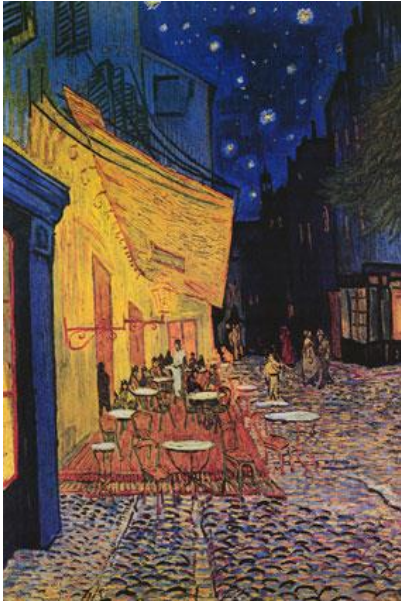

\$7.98, 24x36, #328931, Van Gogh

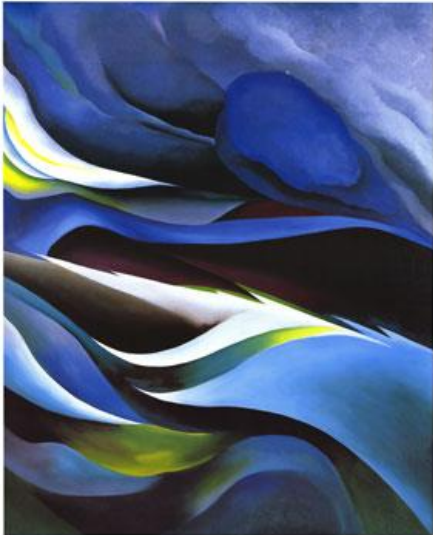

\$16.99, 22x28, #290840,  
Georgia O'Keeffe

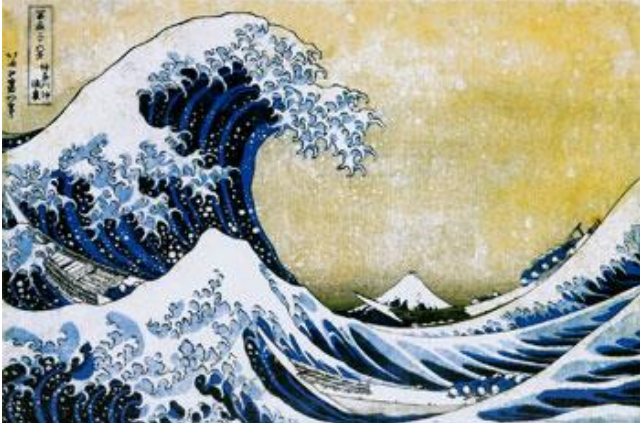

\$8.99, 34x24, #153072, Hokusai Katsushika

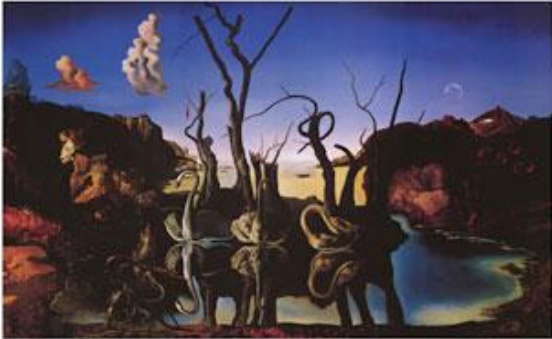

\$11.99, 36x24, #96970, Salvador Dali



# Nature Motivational Posters

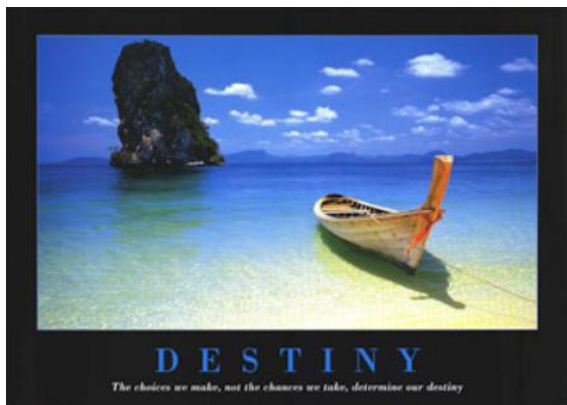

“The choices we make, and the chances we take, determine our destiny”, \$8.99, 34x24, #1582

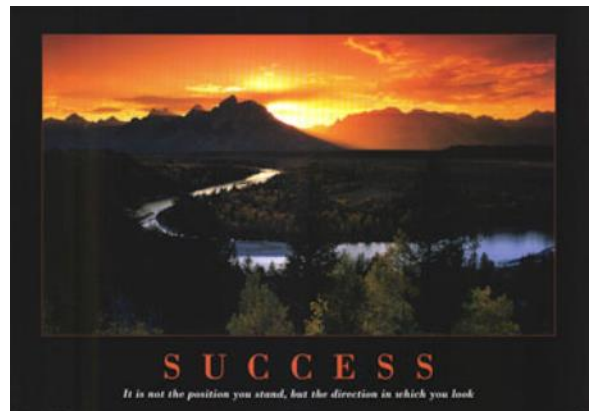

“It is not the position you stand but the direction in which you look”, \$8.99, 34x24, #1581

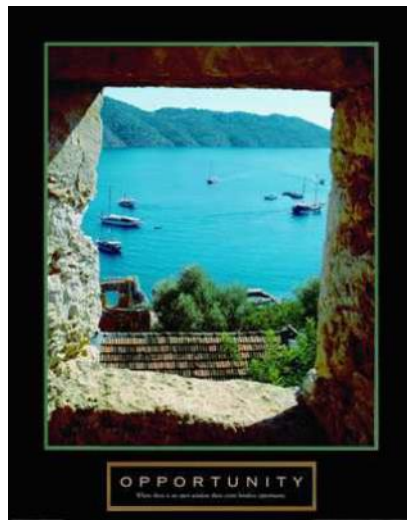

“When there is an open window there exists limitless opportunity”, \$11.99, 22x28, #328265

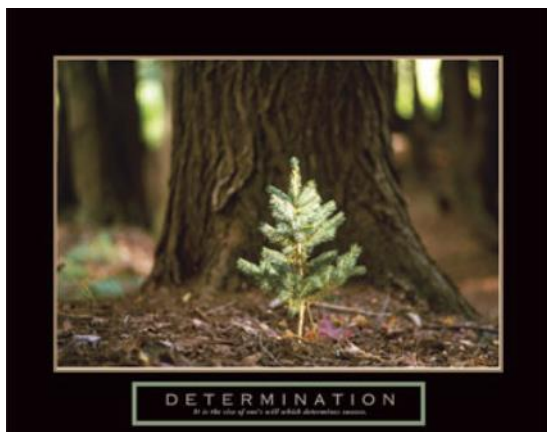

“It is size of one’s will, that determines success”, \$11.99, 28x22, #422293

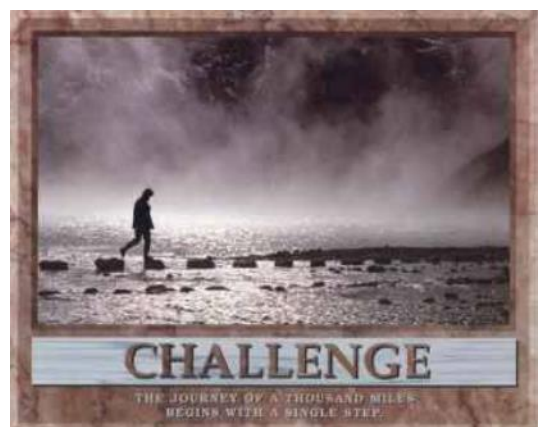

“The journey of a thousand miles begins with a single step”, \$6.99, 20x16, #1336867

# Sports Posters

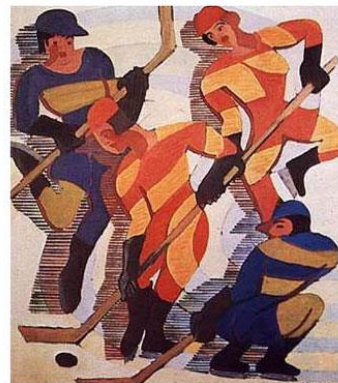

\$16.99, 23x29, #125539

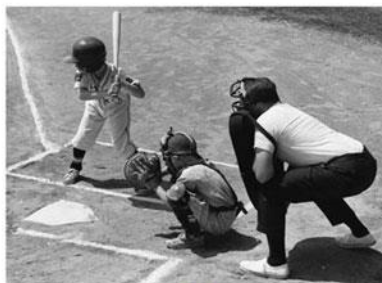

PLAY BALL

\$11.99, 20x16, #1641321

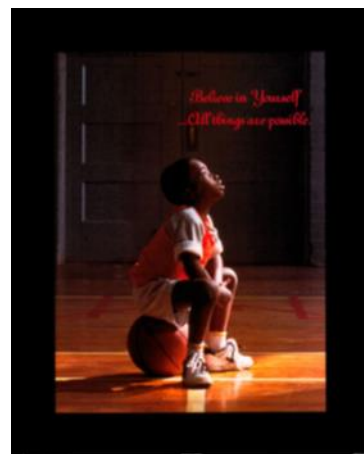

\$12.99, 16x20, #861021

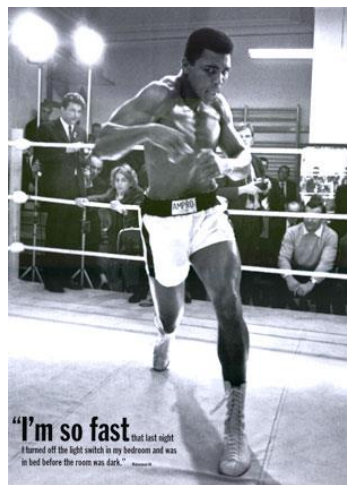

"I'm so fast...  
I turned off the light switch in my bedroom and was  
in bed before the room was dark."

"I'm so fast that last night I turned off the light switch in my bedroom and was in bed before the room was dark"

\$8.99, 24x36, #309531

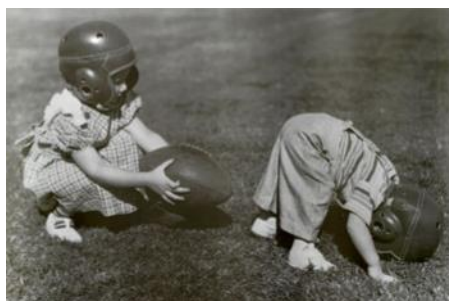

\$10.99, 36x24, #1111258

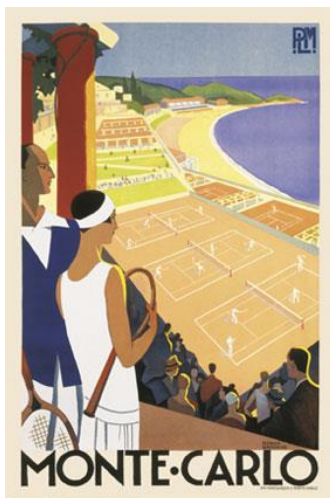

\$16.99, 24x36, #1114167

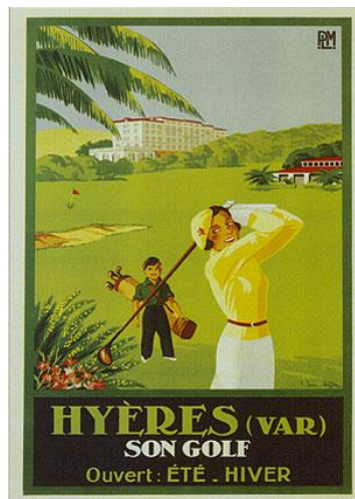

\$10.99, 24x36, #426382



# Movie Posters

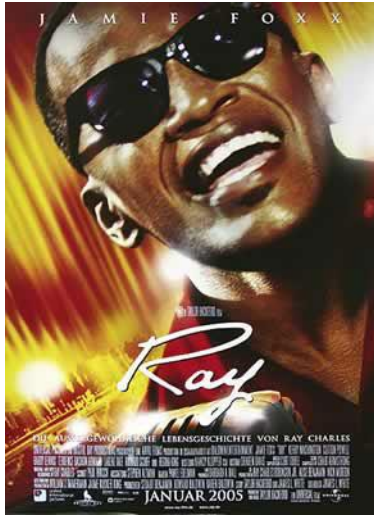

\$19.99, 11x17, #1112874

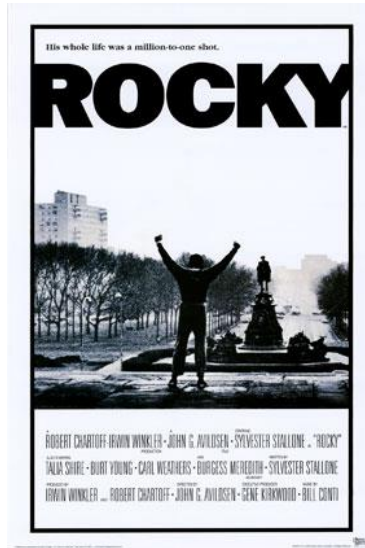

\$8.99, 25x35, #153070

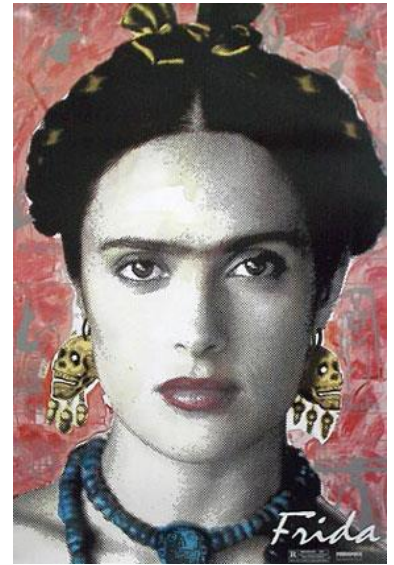

\$12.99, 27x40, #371365

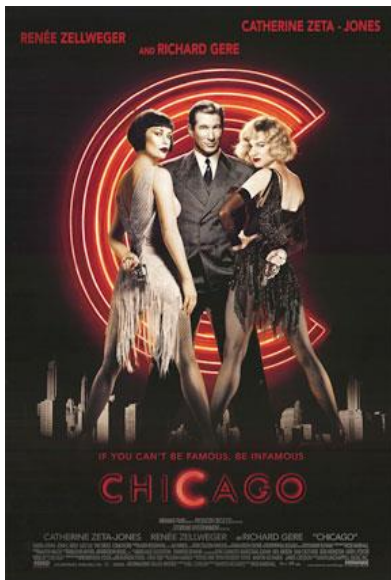

\$8.99, 24x36, #361368

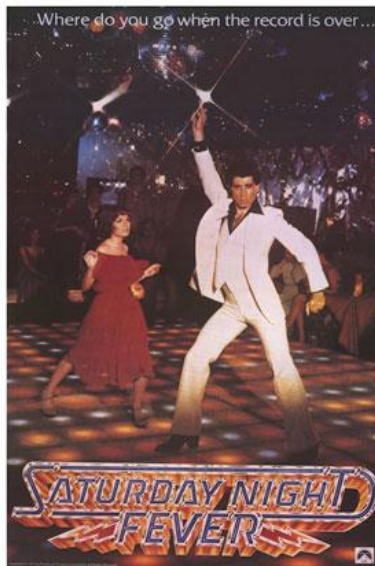

\$14.99, 27x40, #96443

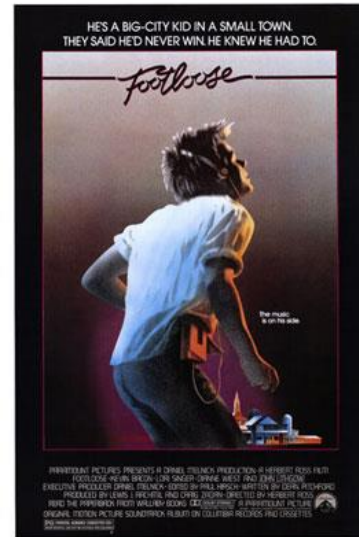

\$19.99, 11x17, #939706

Running to catch the elevator doesn't count. Take the stairs.

Groove your body 10 minutes 3 times a day.

do.

Race the elevator.

Groove your body 10 minutes 3 times a day.

do.

Practice a fire drill in reverse.

Groove your body 10 minutes 3 times a day.

do.

In case of fire take the stairs. In case of boredom take the stairs. In case of holiday overeating take the stairs. In case of high blood pressure take the stairs. In case of big lunch take the stairs. In case of stress take the stairs. In case of fudge sundae take the stairs.

Groove your body 10 minutes 3 times a day.

do.

Free StairMaster

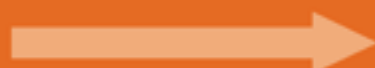

Groove your body 10 minutes 3 times a day.

do.

Don't just stand there.

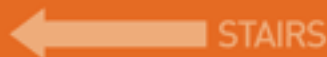

Groove your body 10 minutes 3 times a day.

do.

Don't let the machines win. Take the stairs.

Groove your body 10 minutes 3 times a day.

do.

Don't escape your cubicle just to get in another.

Groove your body 10 minutes 3 times a day.

do.

do.climb

Groove your body 10 minutes 3 times a day.

Prepare yourself for climbing the corporate ladder. Climb the corporate stairs.

Groove your body 10 minutes 3 times a day.

do.

Avoid awkward silences. Next time take the stairs.

Groove your body 10 minutes 3 times a day.

do.

Enjoy elevator music for a change.

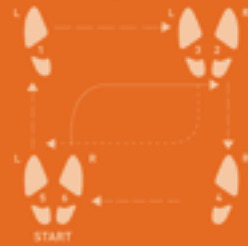

Groove your body 10 minutes 3 times a day.

do.

Stairs. They're not just for claustrophobics anymore.

Groove your body 10 minutes 3 times a day.

do.

Workout more than your finger. Take the stairs.

Groove your body 10 minutes 3 times a day.

do.

Elevators bring you down. Stairs lift you up.

Groove your body for 10 minutes 3 times a day.

do.

Posters from the DO Groove campaign Blue Cross Blue Shield of Minnesota were free and they were used to promote stairs and increasing movement throughout the workday. They were posted throughout all three worksites especially by elevators and stairwell entrances.

<http://www.do-groove.com/index.aspx>

The cdc also has free posters that were used:  
[http://www.cdc.gov/nccdphp/dnpa/hwi/toolkits/stairwell/stairwell\\_messages.pdf](http://www.cdc.gov/nccdphp/dnpa/hwi/toolkits/stairwell/stairwell_messages.pdf)

Hit Your Target Weight  
by finding ways to add steps to your days!  
Use the stairs often!

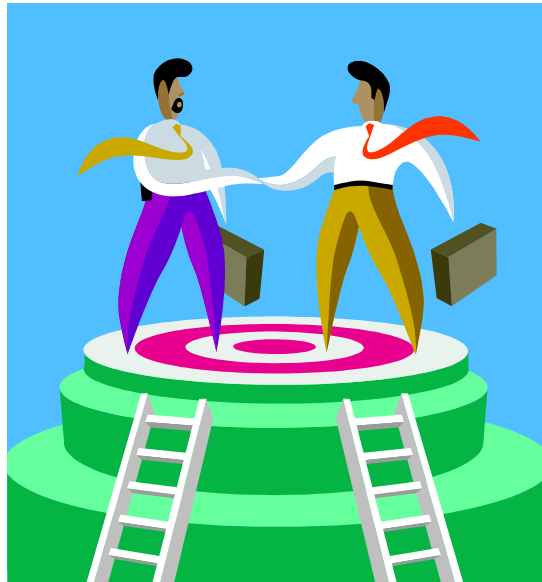

For just a little fun I have placed riddles in the stairwell. The riddle is on one level and the answer is one level up. Each day I will choose one of the riddles and email the question to you. Find the answer to the riddle and email the answer to me to be entered into the daily drawing!

All are welcome to use the stairs and enjoy the riddles but only participants in the Final Challenge are eligible to enter the drawing and win!



# Riddle of the Day

Where will you find roads  
without cars, forests without  
trees, and cities without  
houses?

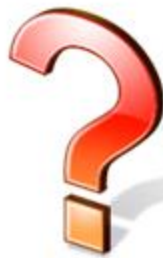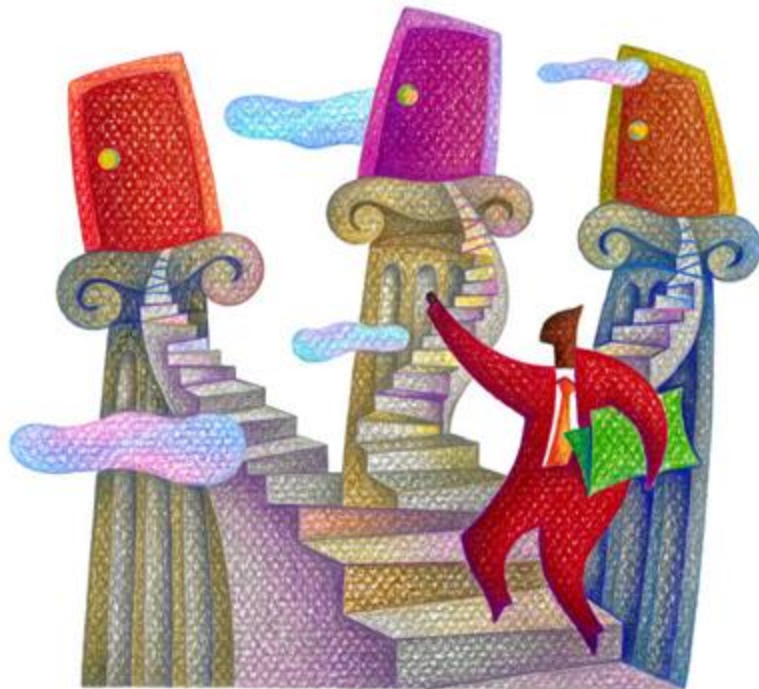

Find the key to the riddle on the  
next floor.

# On a map

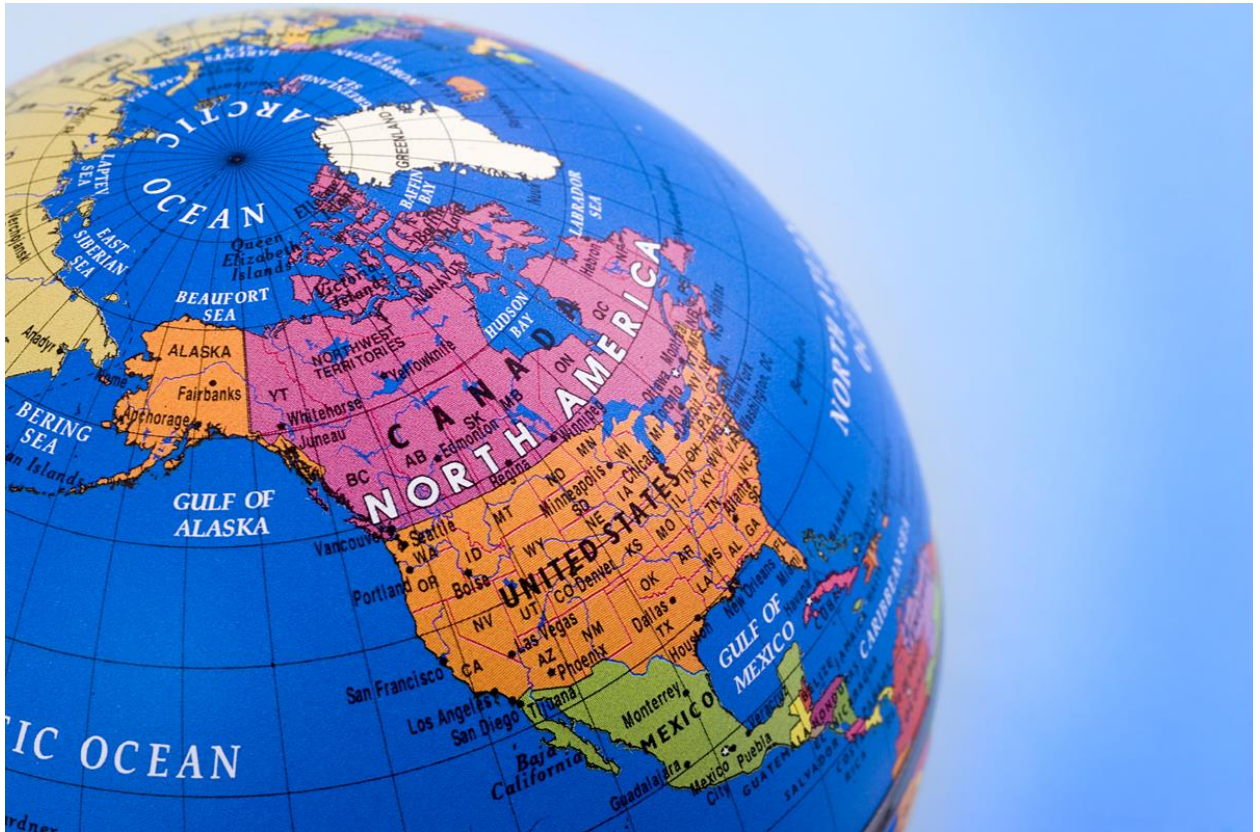



# Riddle of the Day

**Never resting, never still.  
Moving silently from hill to hill.  
It does not walk, run or trot, All  
is cool where it is not. What is  
it?**

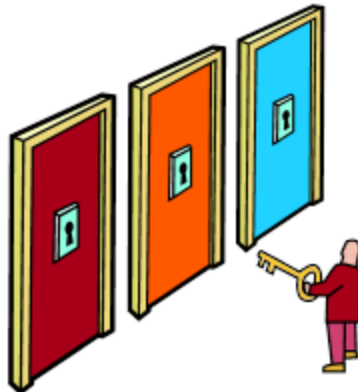

Find the Key to the Riddle of the Day

Use the Stairwell to find the key to the riddle of the day. Email the answer to me to enter into a daily drawing!

# Sunshine

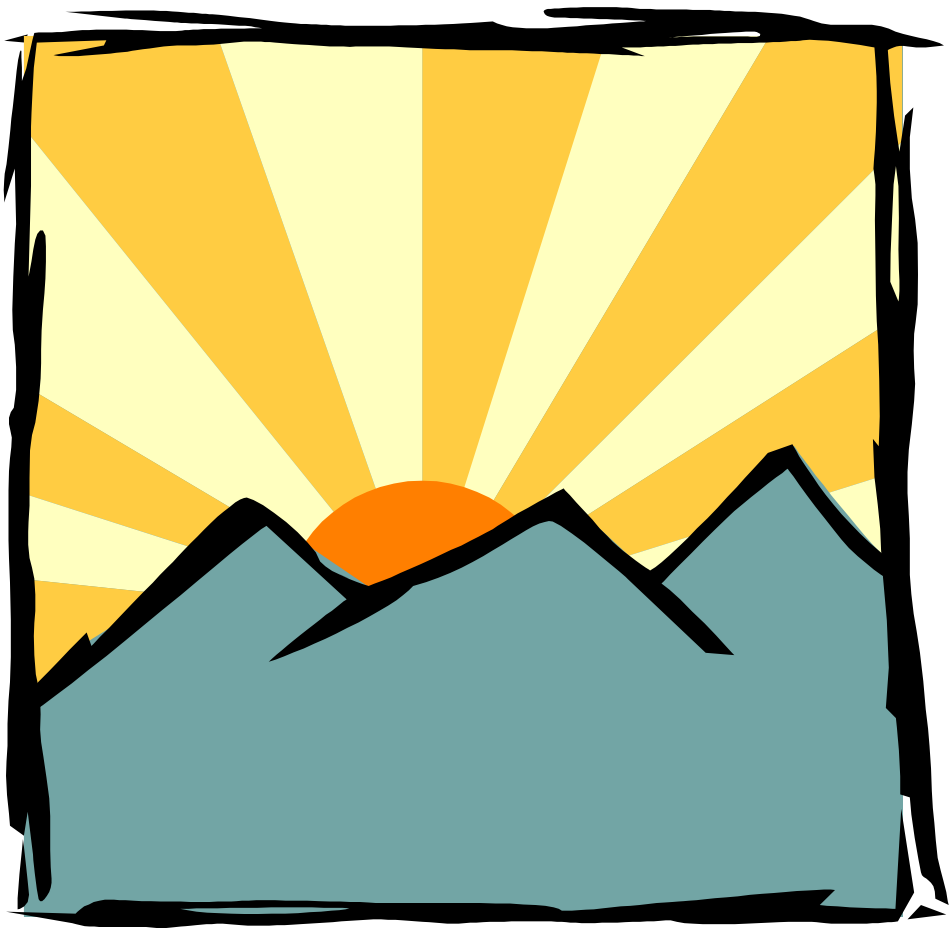

# Riddle of the Day

What gets wetter and  
wetter the more it dries?

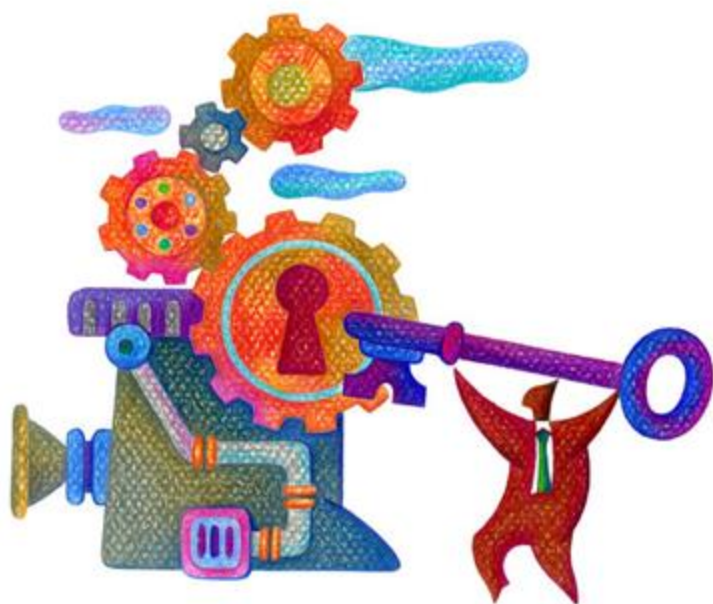

Find the Key to the Riddle of the Day

Use the Stairwell to find the key to the riddle of the day. Email the answer to me to enter into a daily

**A towel**

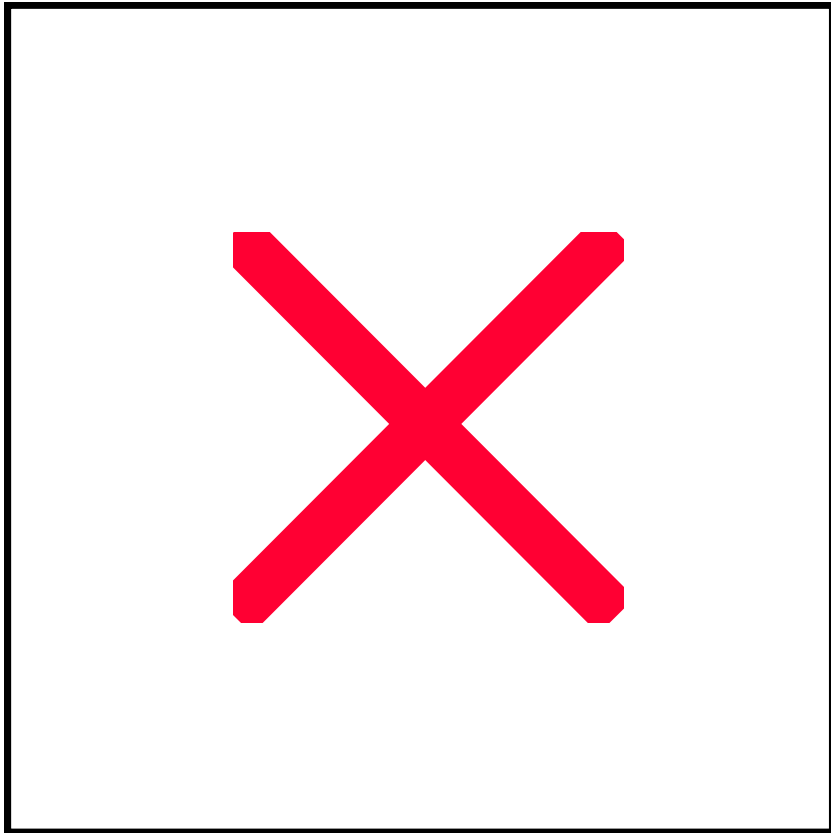

# Riddle of the Day

What goes up and down the stairs without moving?

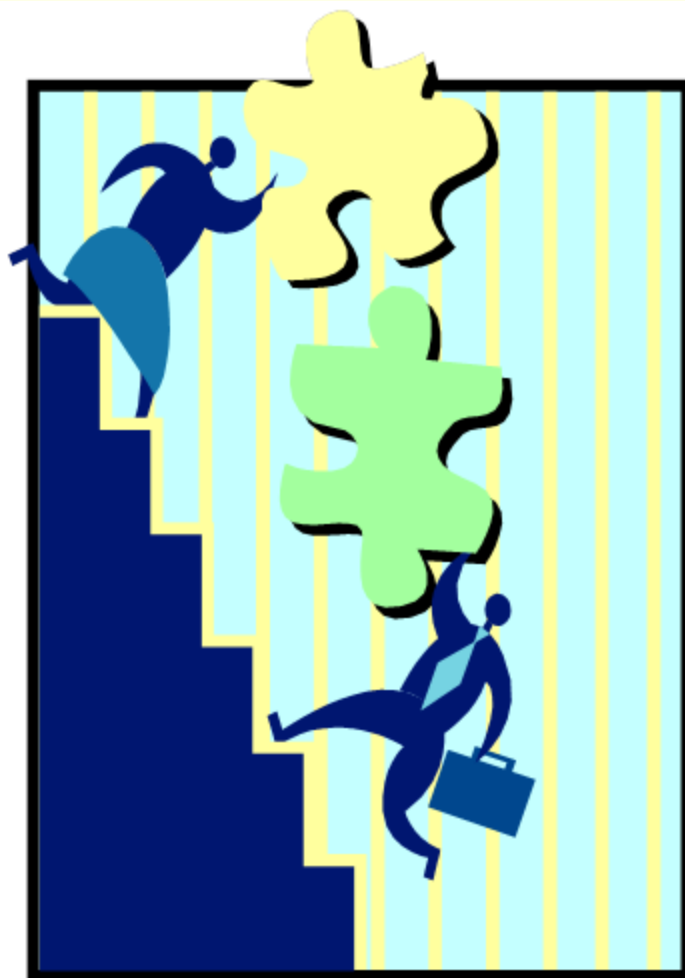

Find the Key to the Riddle of the Day

Use the Stairwell to find the key to the riddle of the day. Email the answer to me to enter into a daily drawing!

**A carpet**

# Riddle of the Day

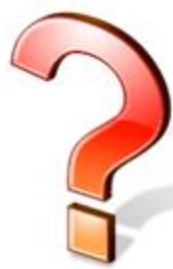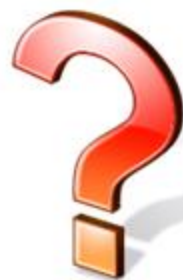

What is it?

The more you take, the  
more you leave behind.

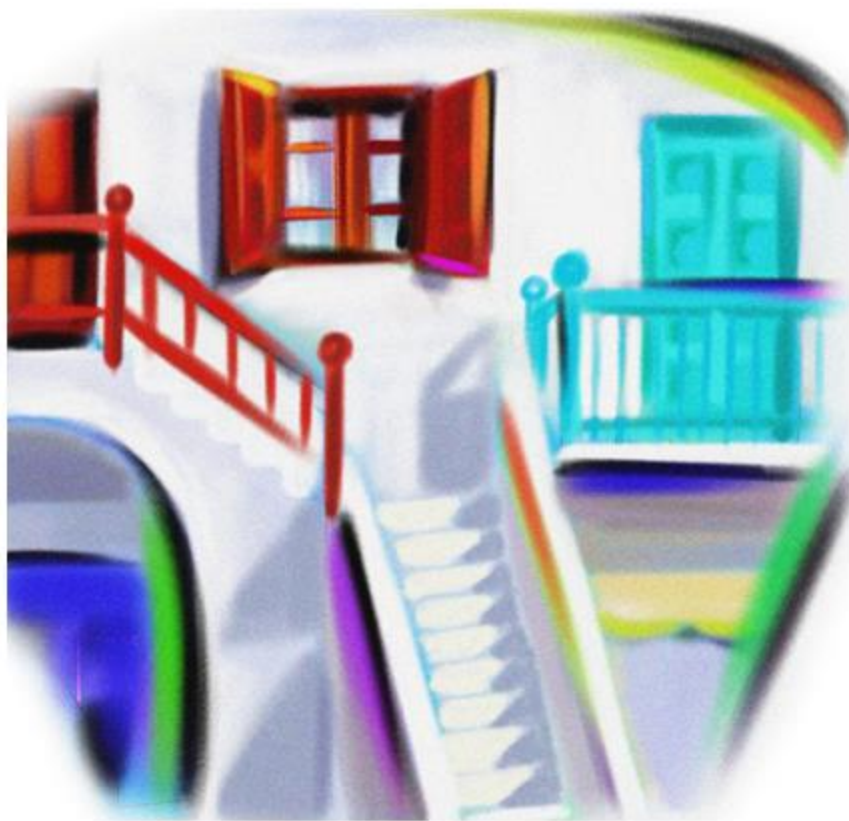

To find the key to the riddle use the stairs

# Footsteps



# Riddle of the Day

There is a word in the English language in which the first two letters signify a male, the first three letters signify a female, the first four signify a great man, and the whole word, a great woman. What is the word?

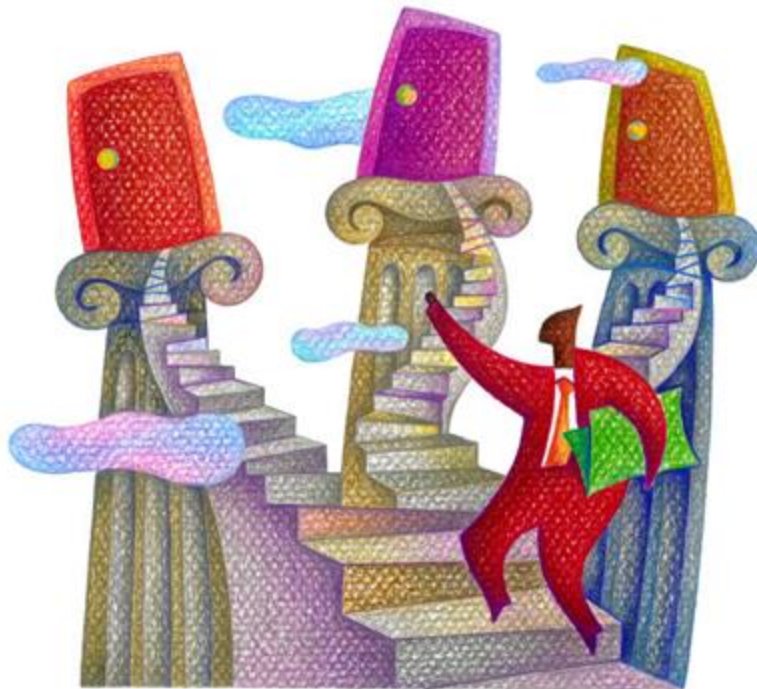

Find the Key to the Riddle of the Day in the stairwell.

Heroin

# Riddle of the Day

You do not want to have me, but  
when you have me, You do not  
want to lose me.

What am I?

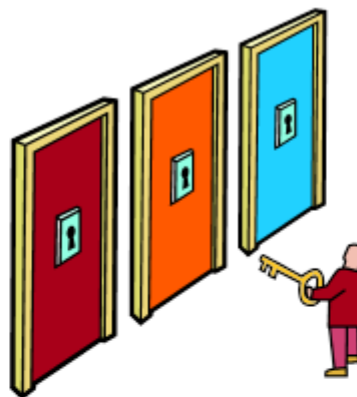

Find the Key to the Riddle of the Day

Use the Stairwell to find the key to the riddle of the day.  
Email the answer to me to enter into a daily drawing!

# A Lawsuit

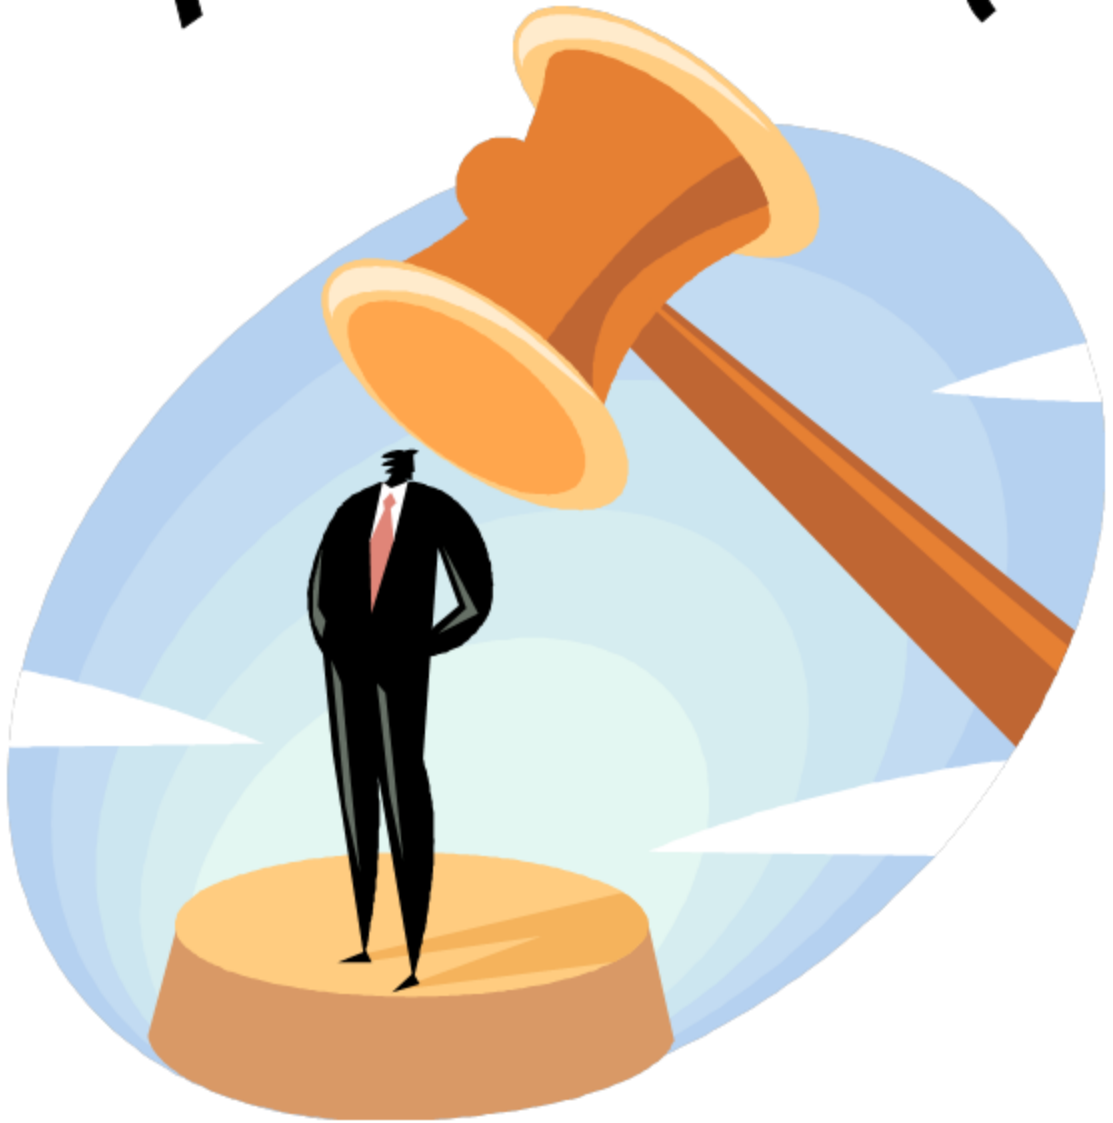

# Riddle of the Day

**How can you physically stand behind your friend as he physically stands behind you?**

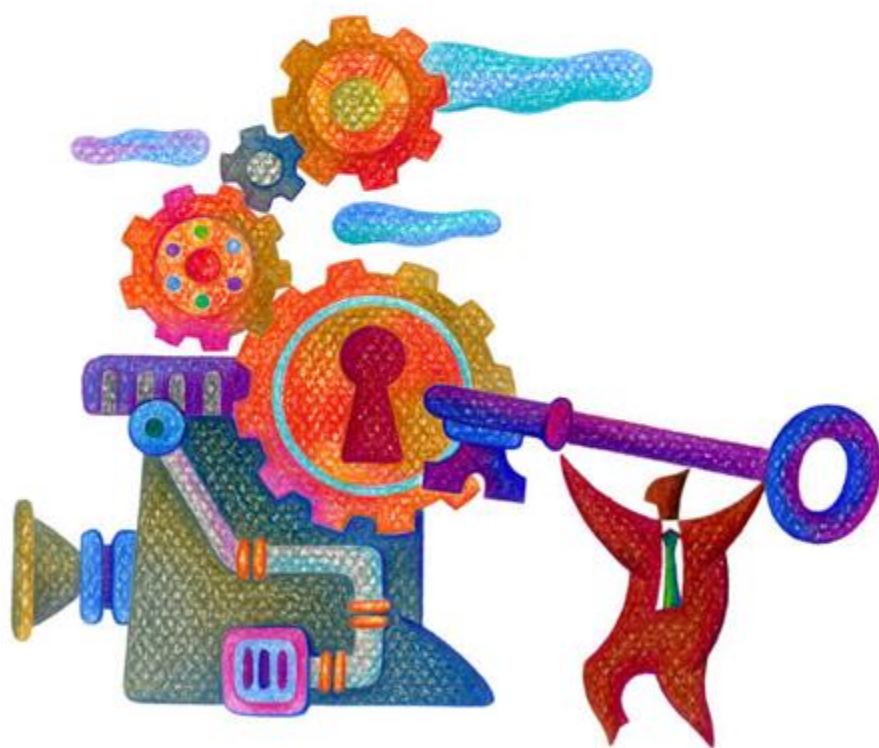

Find the Key to the Riddle of the Day in the stairwell.

Stand Back to  
Back

# Riddle of the Day

**What does man love more than life?  
Fear more than death or mortal strife?  
What the poor have, what the rich  
require, and what contented men  
desire? What does  
the miser spend, the spendthrift save,  
And all men carry to their graves?**

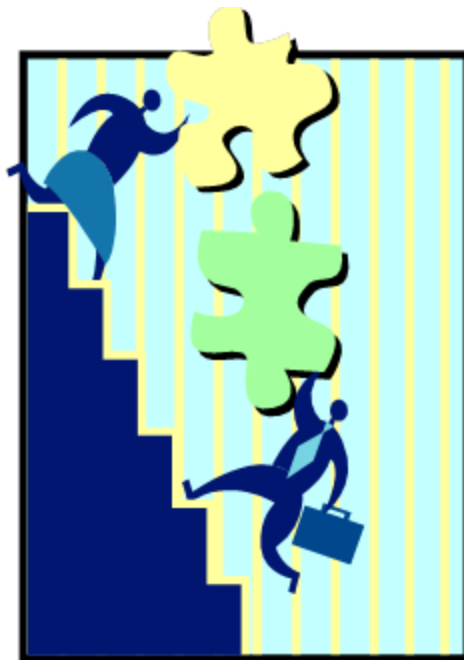

Find the Key to the Riddle of the Day  
in the stairwell.

Nothing



# Riddle of the Day

This thing runs but cannot walk,  
sometimes sings but never talks. Lacks  
arms, has hands; lacks a head but has a  
face

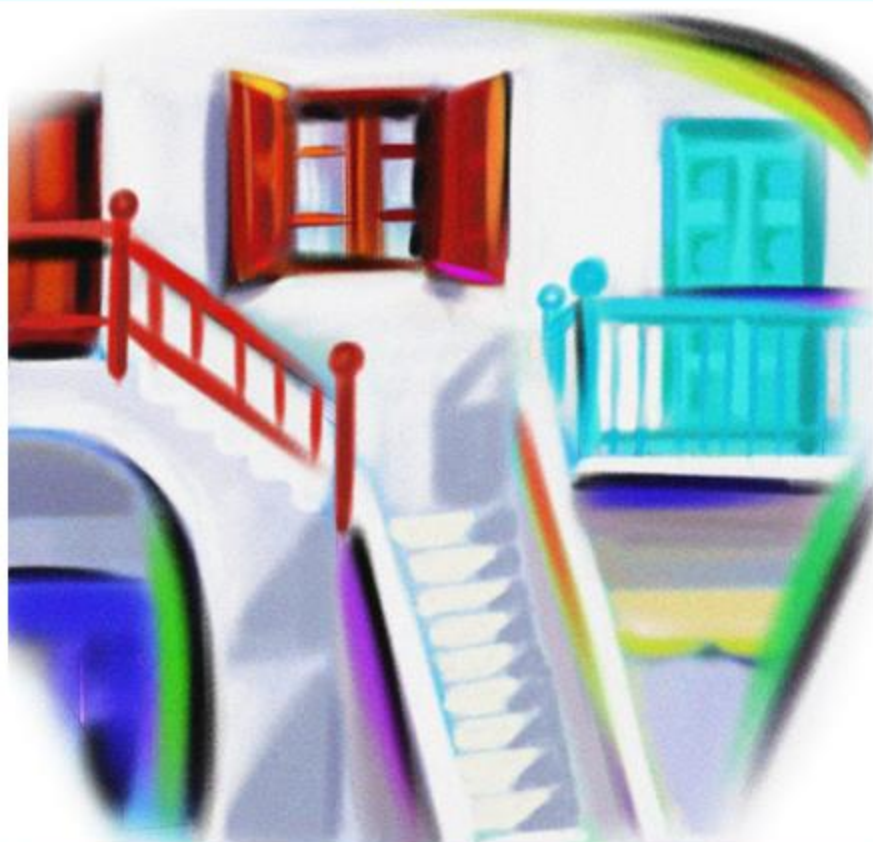

Find the Key to the Riddle of the Day

Use the Stairwell to find the key to the riddle  
of the day. Email the answer to me to enter

# A Clock

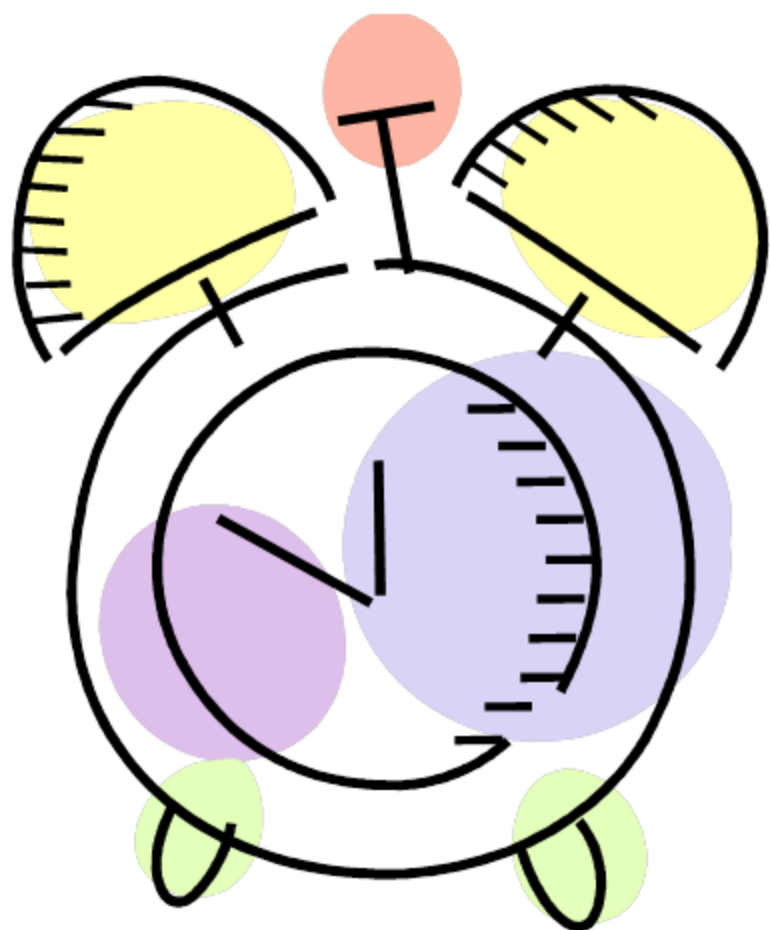

# Riddle of the Day

What goes around the world  
but stays in a corner?

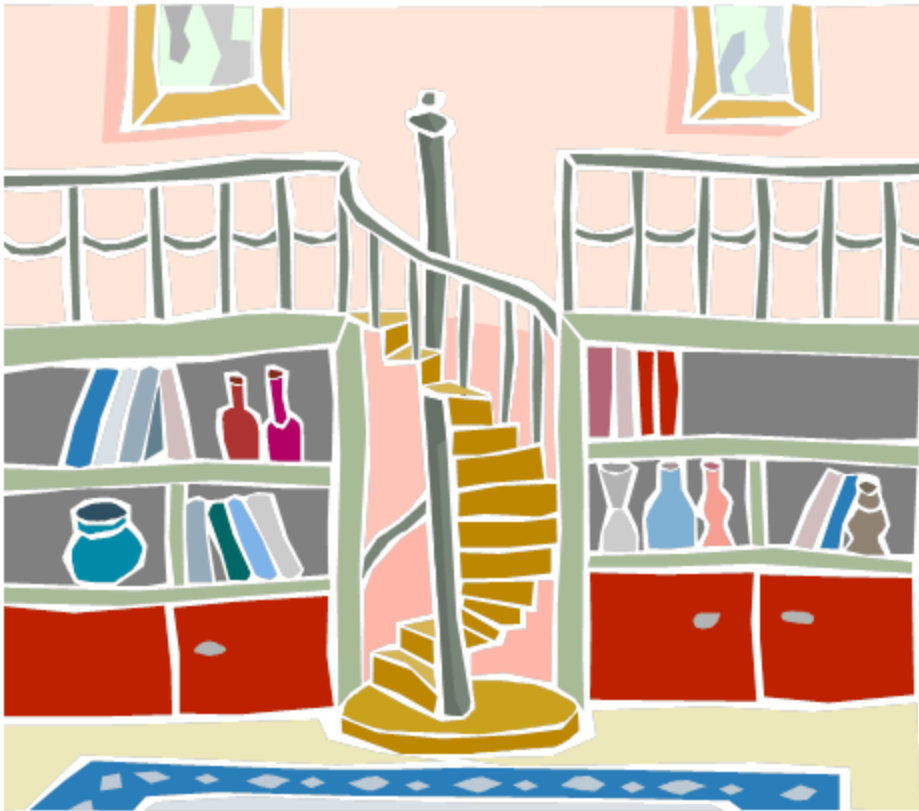

Find the Key to the Riddle of the Day

Use the Stairwell to find the key to the riddle of the day. Email the answer to me to enter into a daily drawing!

# A Stamp

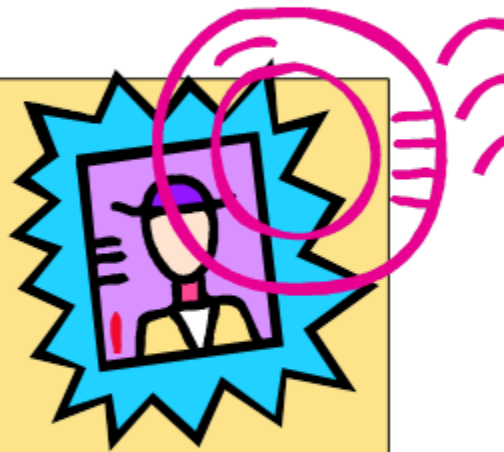

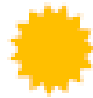

I'm walkin'.  
Yes, indeed.

(Fats Domino)

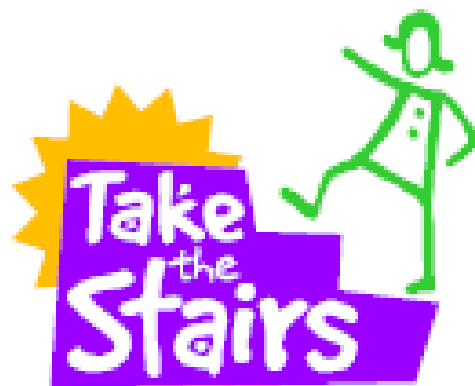

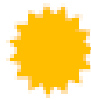

Change  
happens  
one step  
at a time.

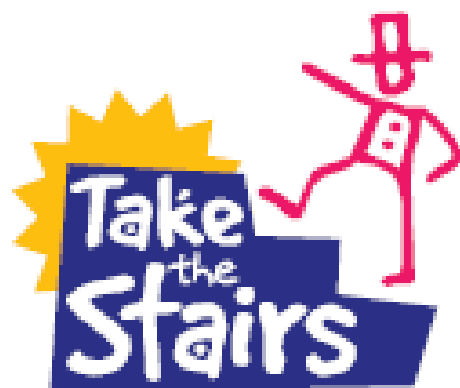

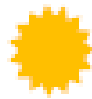

The victory  
is not always  
to the  
swift, but to  
those who  
keep moving.

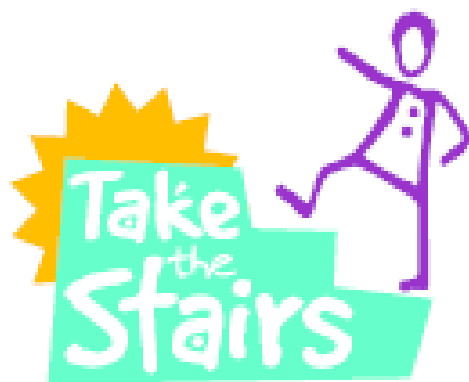



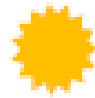

Physical  
activity will  
add years  
to your life,  
and life to  
your years.

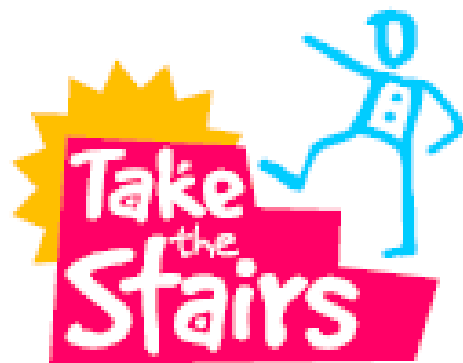

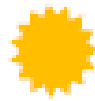

The first  
wealth  
is  
health.

(Ralph Waldo Emerson)

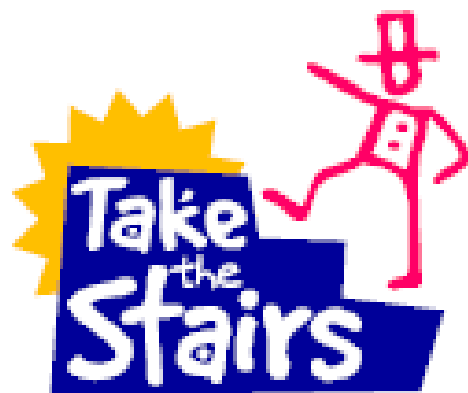

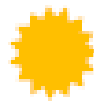

In one minute,  
a 150 pound  
person burns  
approximately  
10 calories  
walking up stairs,  
and only 1.5  
calories riding  
an elevator.

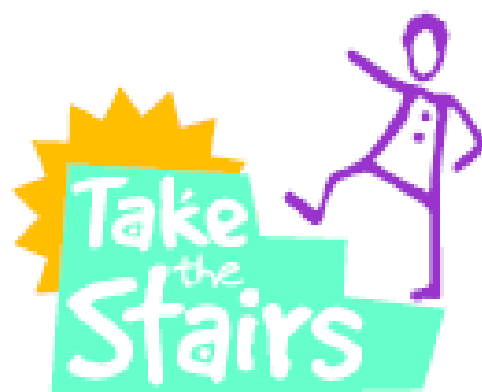

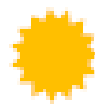

Walking  
up stairs  
burns almost  
5 times more  
calories than  
riding an  
elevator.

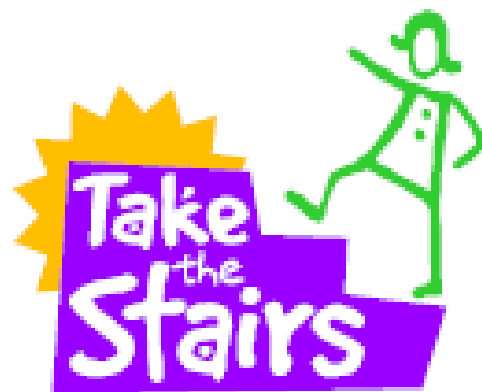

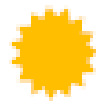

There are  
1440 minutes  
in every day...  
schedule 30  
of them for  
physical  
activity.

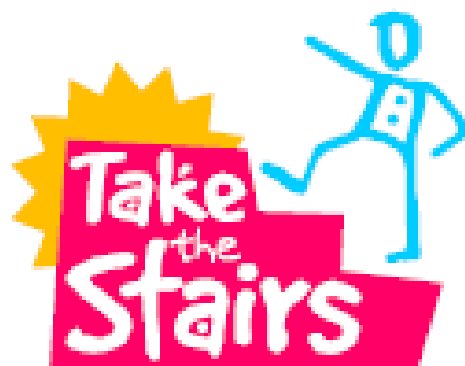

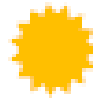

No  
waiting  
one door  
over.

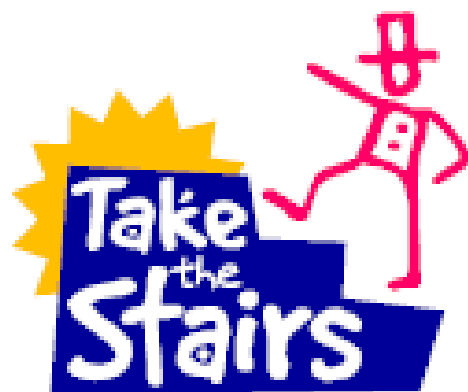

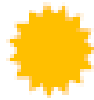

Small  
steps  
make big  
differences.

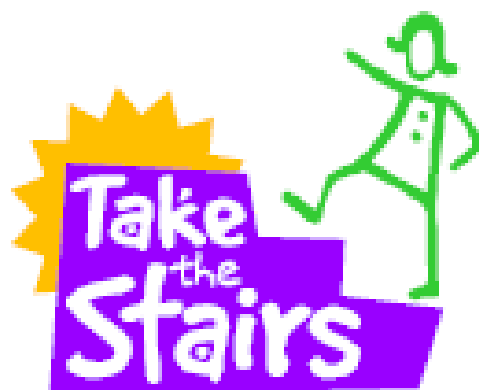



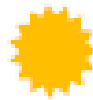

Raise your  
fitness level,  
one step  
at a  
time.

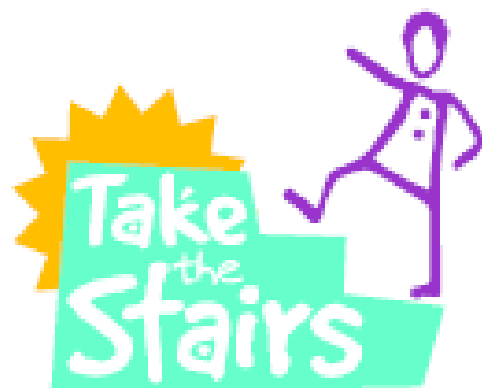

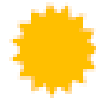

Fight fat...

Feel fit...

Frequent  
these  
flights.

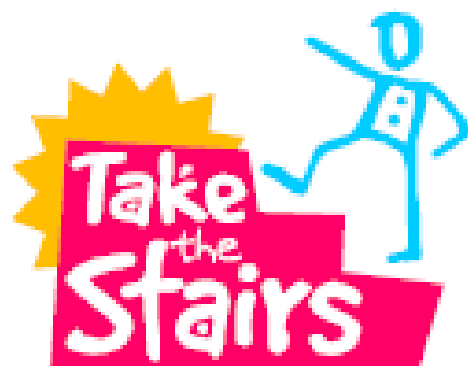

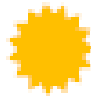

Step up  
to a  
healthier  
lifestyle.

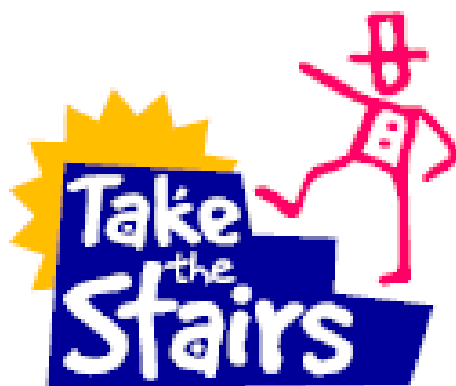

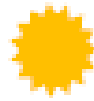

Take a  
little walk  
with me.

(Muddy Waters)

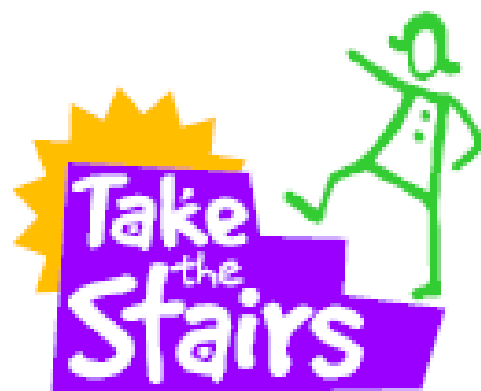

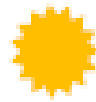

One step  
farther  
each day.  
You can  
do it.

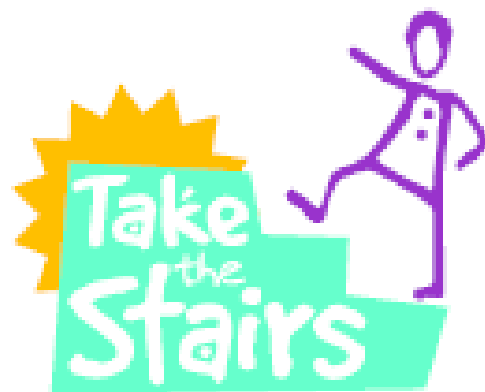

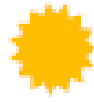

Now  
that you  
have  
refueled...

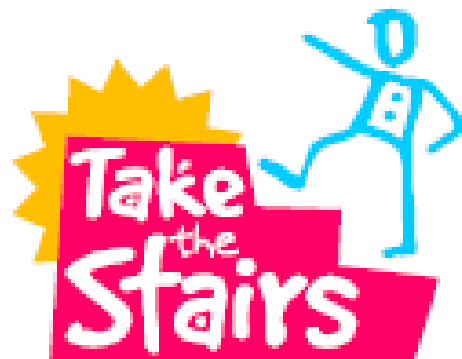

Supplement: NIHMS574621-supplement-Supplementary_Materials.pdf [file NIHMS574621-supplement-Supplementary_Materials.pdf]
